# Supplementary figures and images for: Hypoxia inducible factor-1 signaling pathway in macrophage involved angiogenesis in materials-instructed osteo-induction
Source: Royal Society of Chemistry journal article supplement (doi:10.1039/d2tb00811d), 2022-01-01

**a**

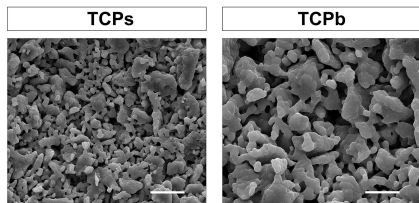

**b**

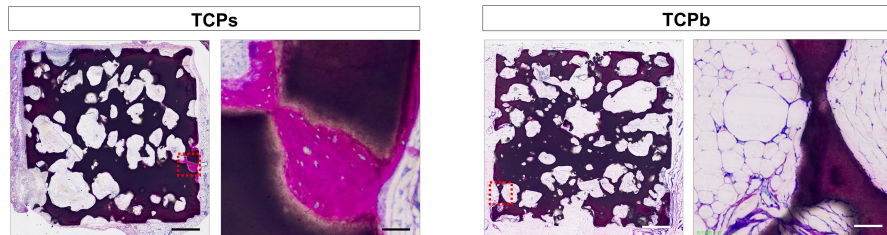

Supplement: d2tb00811d1.pdf [file d2tb00811d1.pdf]

**a**

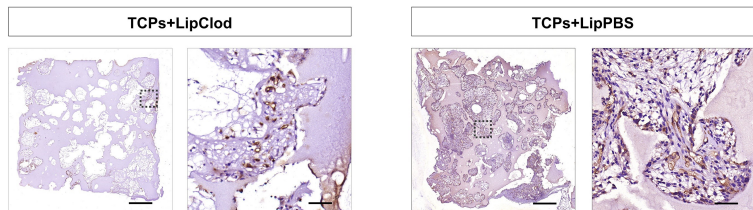

**b**

Adjacent subcutaneous tissue

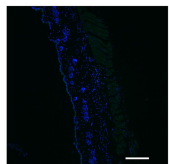

HIF-1 $\alpha$ /Dapi

**c**

TCPs

1 d                      3 d                      7 d                      14 d

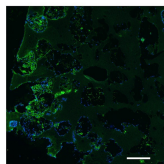

HIF-1 $\alpha$ /Dapi

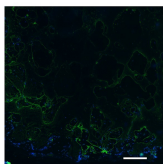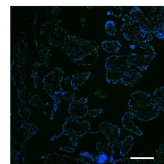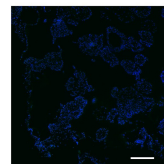

**d**

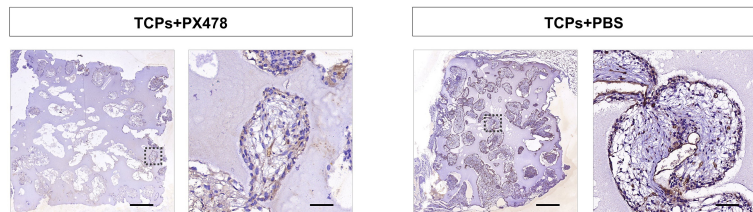

Supplement: d2tb00811d2.pdf [file d2tb00811d2.pdf]

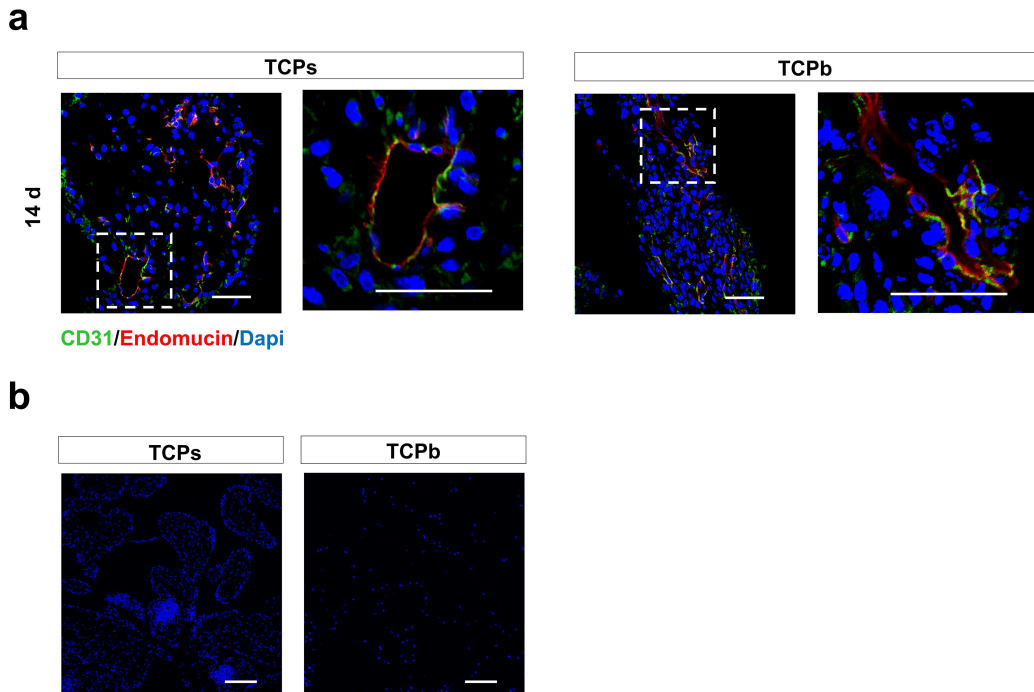

Supplement: d2tb00811d3.pdf [file d2tb00811d3.pdf]
